# Supplementary material for: Anti-inflammatory drugs suppress ultrasound-mediated mesenchymal stromal cell tropism to kidneys
Source: PubMed Central journal article supplement (PMC5561076; doi:10.1038/s41598-017-08887-x), 2017-08-17
Supplement: 41598_2017_8887_MOESM1_ESM.pdf [file 41598_2017_8887_MOESM1_ESM.pdf]

**SUPPLEMENTAL DATA AND METHODS FOR:**

**Anti-inflammatory drugs suppress ultrasound-mediated mesenchymal stromal cell tropism to kidneys**

Scott R. Burks<sup>1</sup>, Ben A. Nguyen<sup>1</sup>, Michele N. Bresler<sup>1</sup>, Matthew E. Nagle<sup>1</sup>, Saejeong J. Kim<sup>1</sup>, and Joseph A. Frank<sup>1,2</sup>

<sup>1</sup>Frank Laboratory, Department of Radiology and Imaging Sciences, National Institutes of Health Clinical Center, Bethesda, MD 20892

<sup>2</sup>National Institute of Biomedical Imaging and Bioengineering, Bethesda, MD 20892

Address Correspondence to:

Scott R. Burks, Ph.D.

10 Center Dr. RmB1N256

Bethesda, MD 20895

[scott.burks@nih.gov](mailto:scott.burks@nih.gov)

phone (301) 594-2368

fax (301) 594-3216

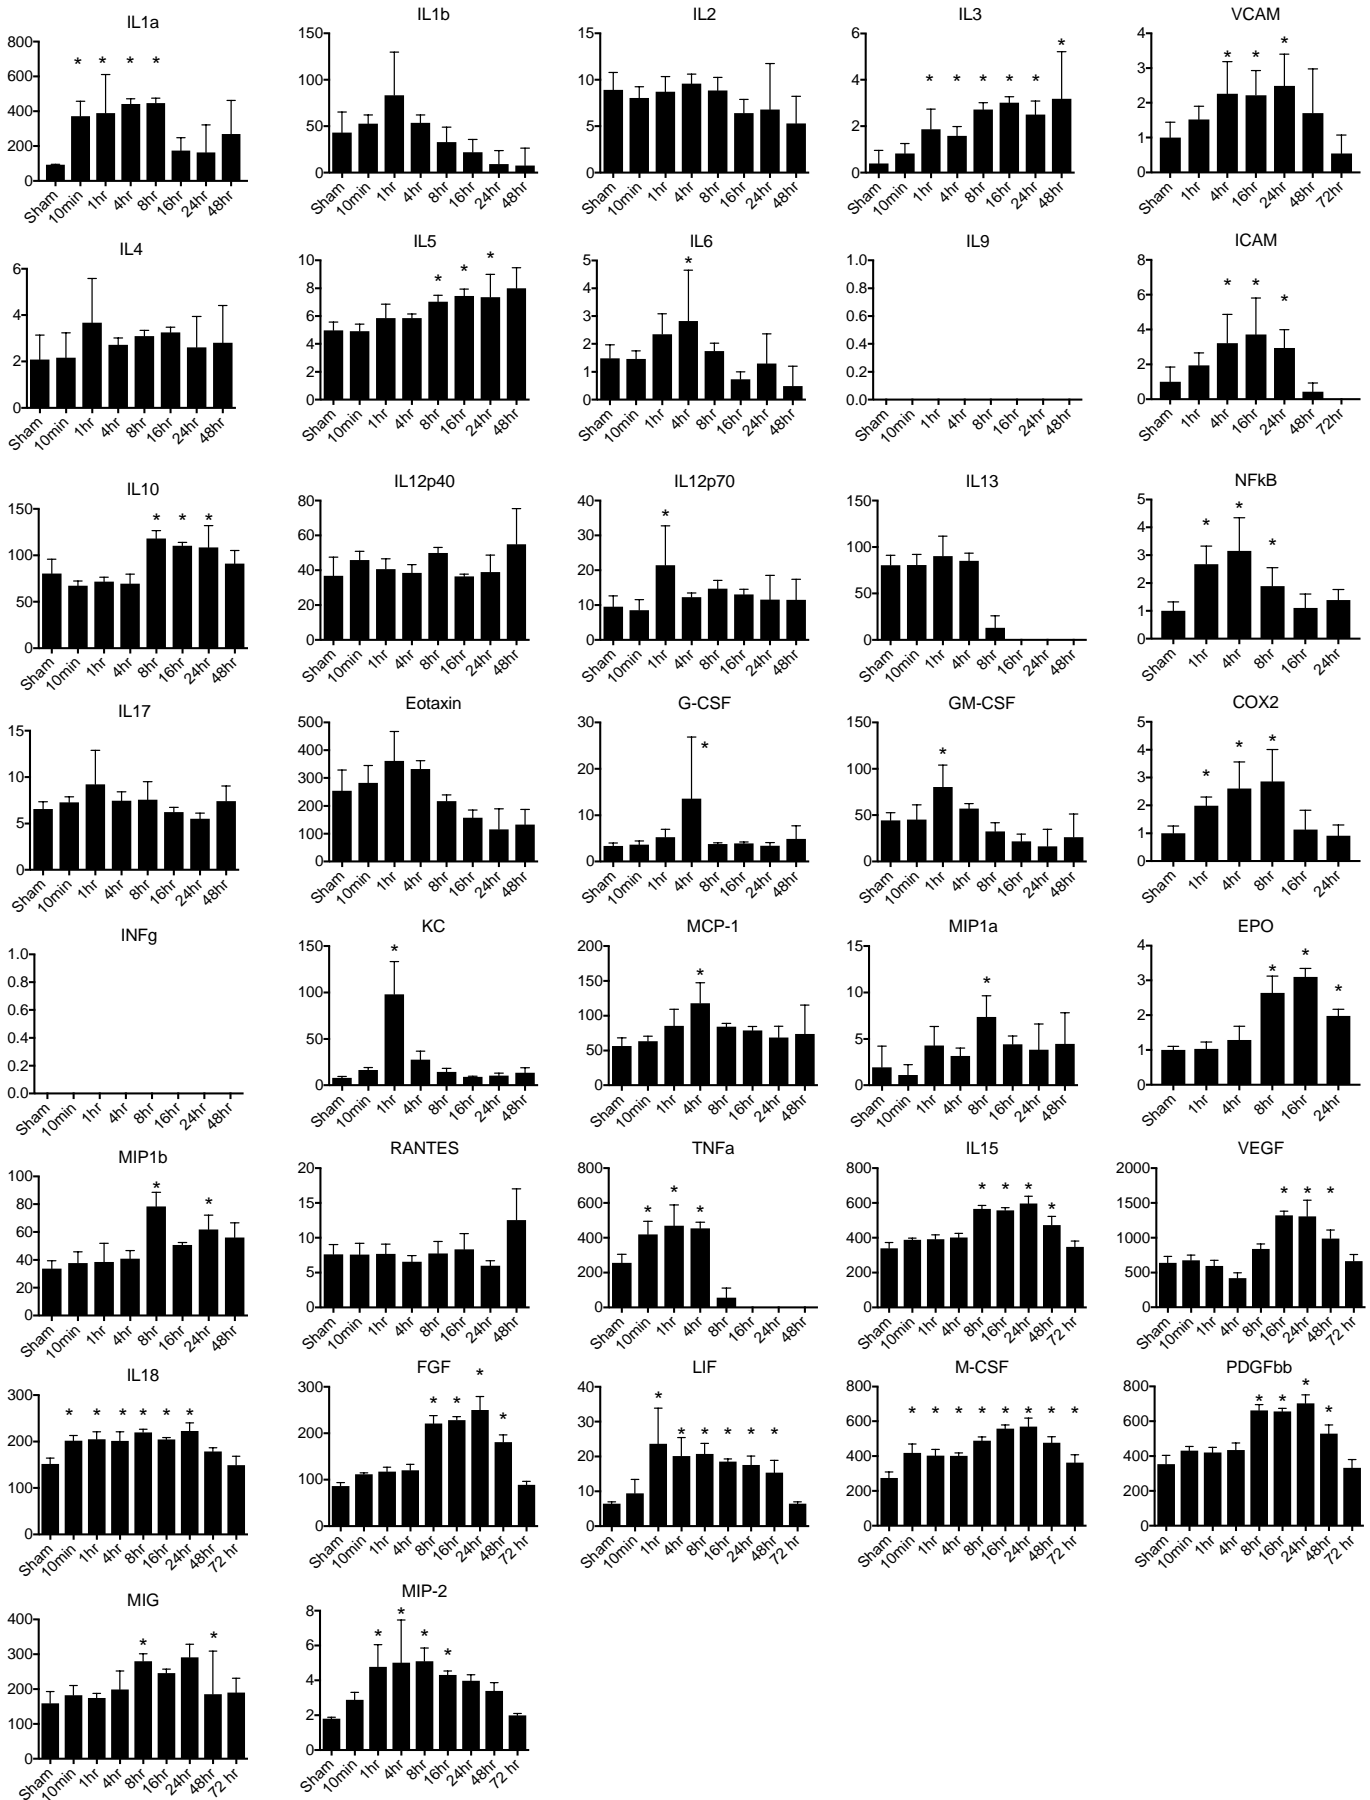

**Supplemental Figure 1.** Temporal changes in cytokines chemokines, trophic factors, and cell adhesion molecules following pFUS to the kidney. Y axes indicate concentration in pg/mL. Asterisks indicate statistically significant increases ( $p < 0.05$ ) from sham (no pFUS) controls by ANOVA using Bonferonni post-hoc analyses.

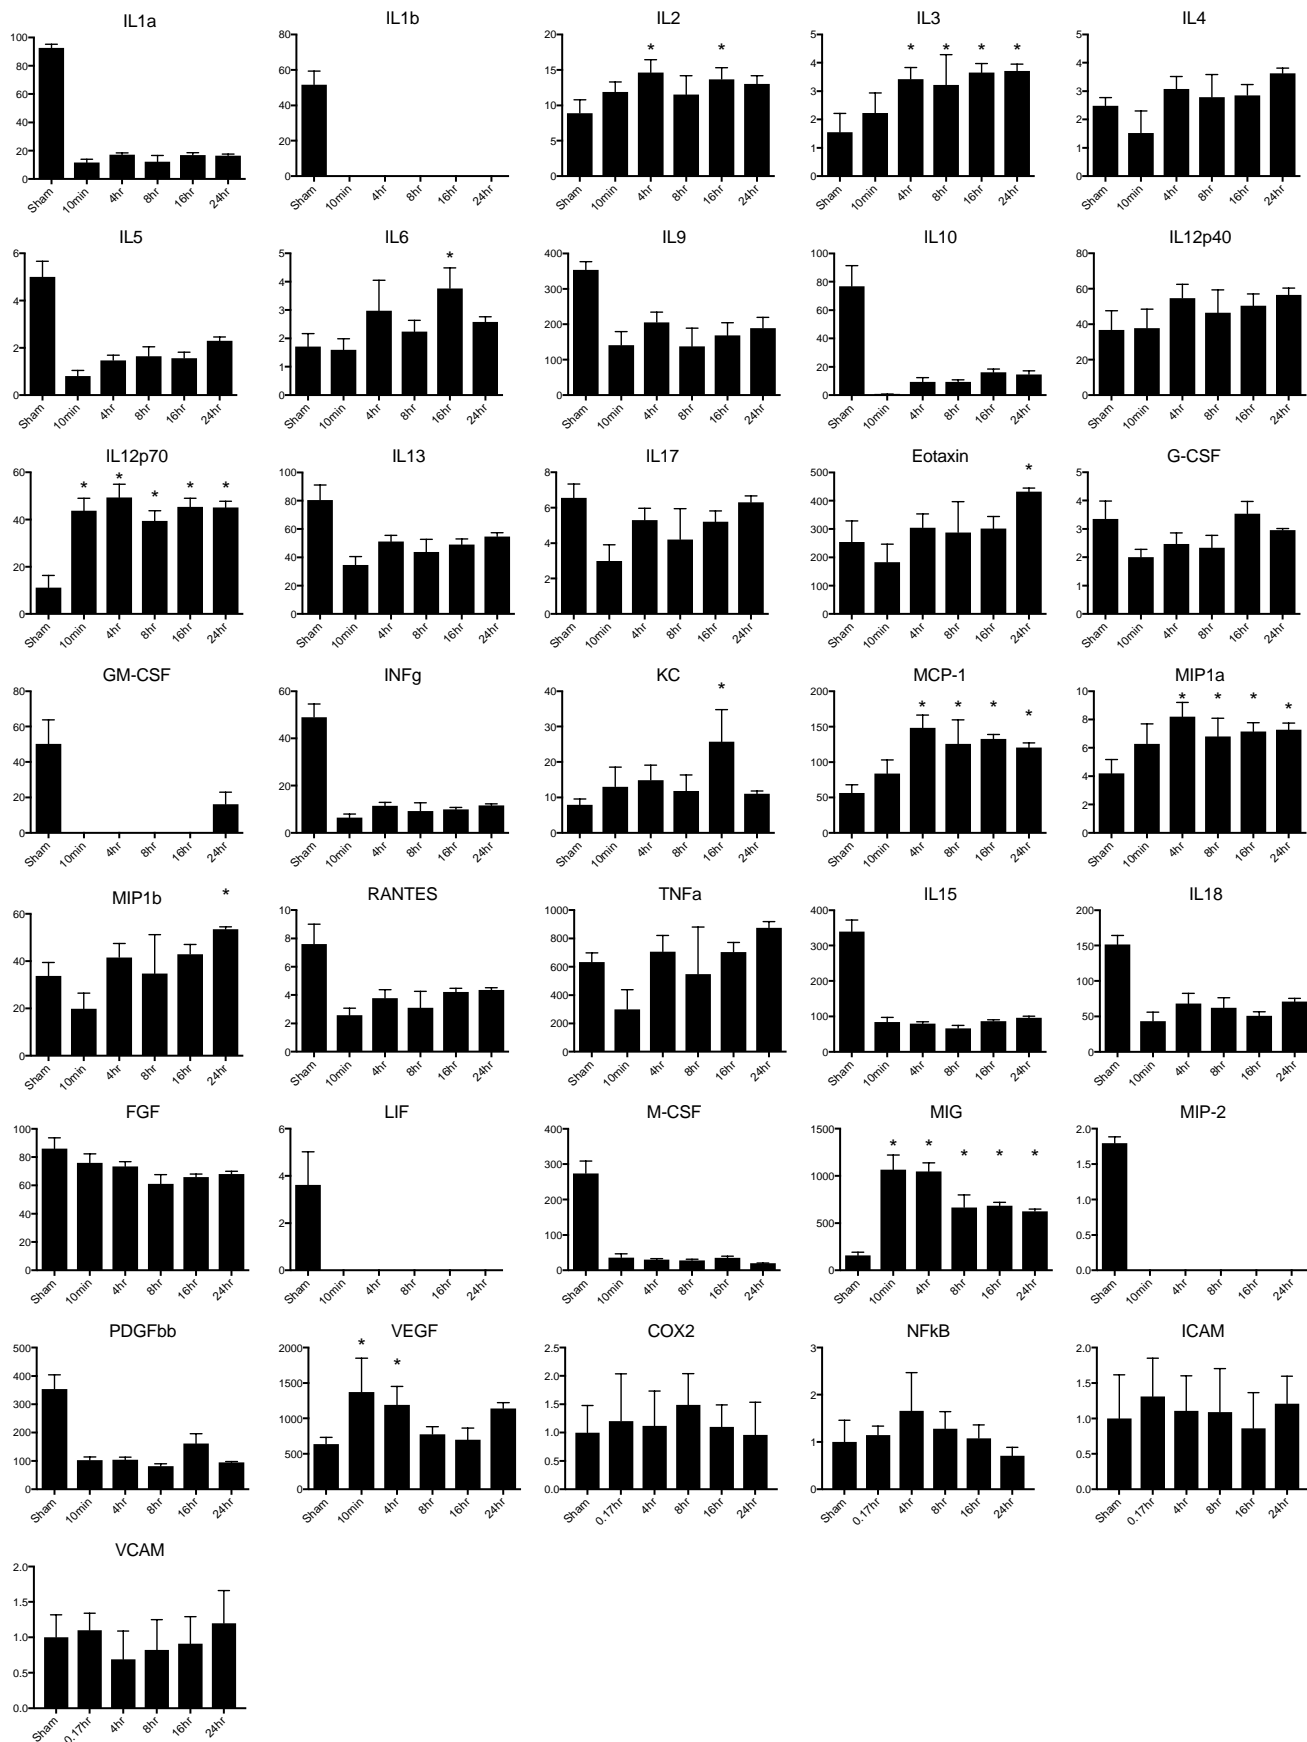

**Supplemental Figure 2.** Temporal changes in cytokines chemokines, trophic factors, and cell adhesion molecules following pFUS to the kidney when mice were pretreated with ibuprofen (see methods for details). Y axes indicate concentration in pg/mL. Asterisks indicate statistically significant increases ( $p < 0.05$ ) from sham (no drugs, no pFUS) controls by ANOVA using Bonferonni post-hoc analyses.

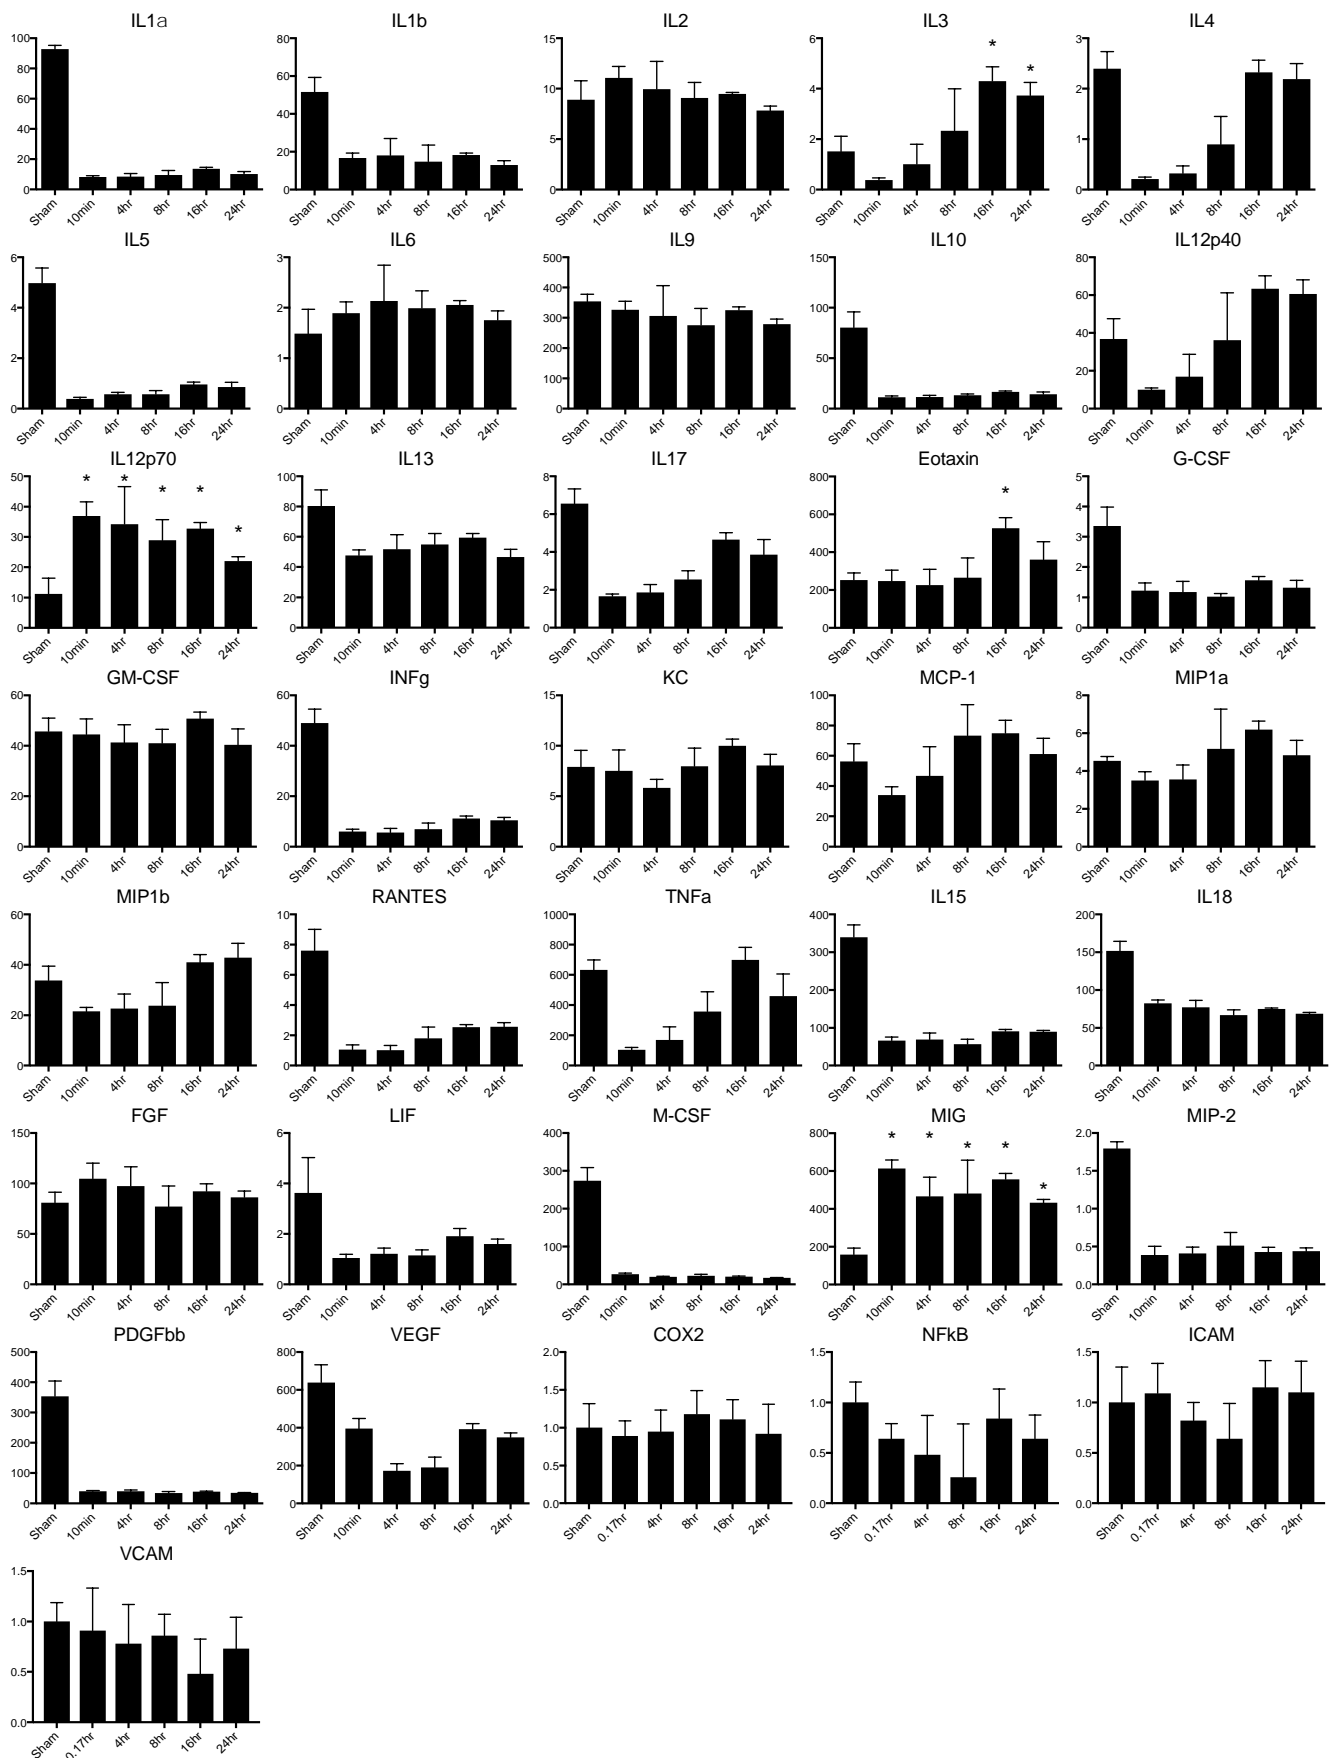

**Supplemental Figure 3.** Temporal changes in cytokines chemokines, trophic factors, and cell adhesion molecules following pFUS to the kidney when mice were pretreated with anakinra (see methods for details). Y axes indicate concentration in pg/mL. Asterisks indicate statistically significant increases ( $p < 0.05$ ) from sham (no drugs, no pFUS) controls by ANOVA using Bonferonni post-hoc analyses.

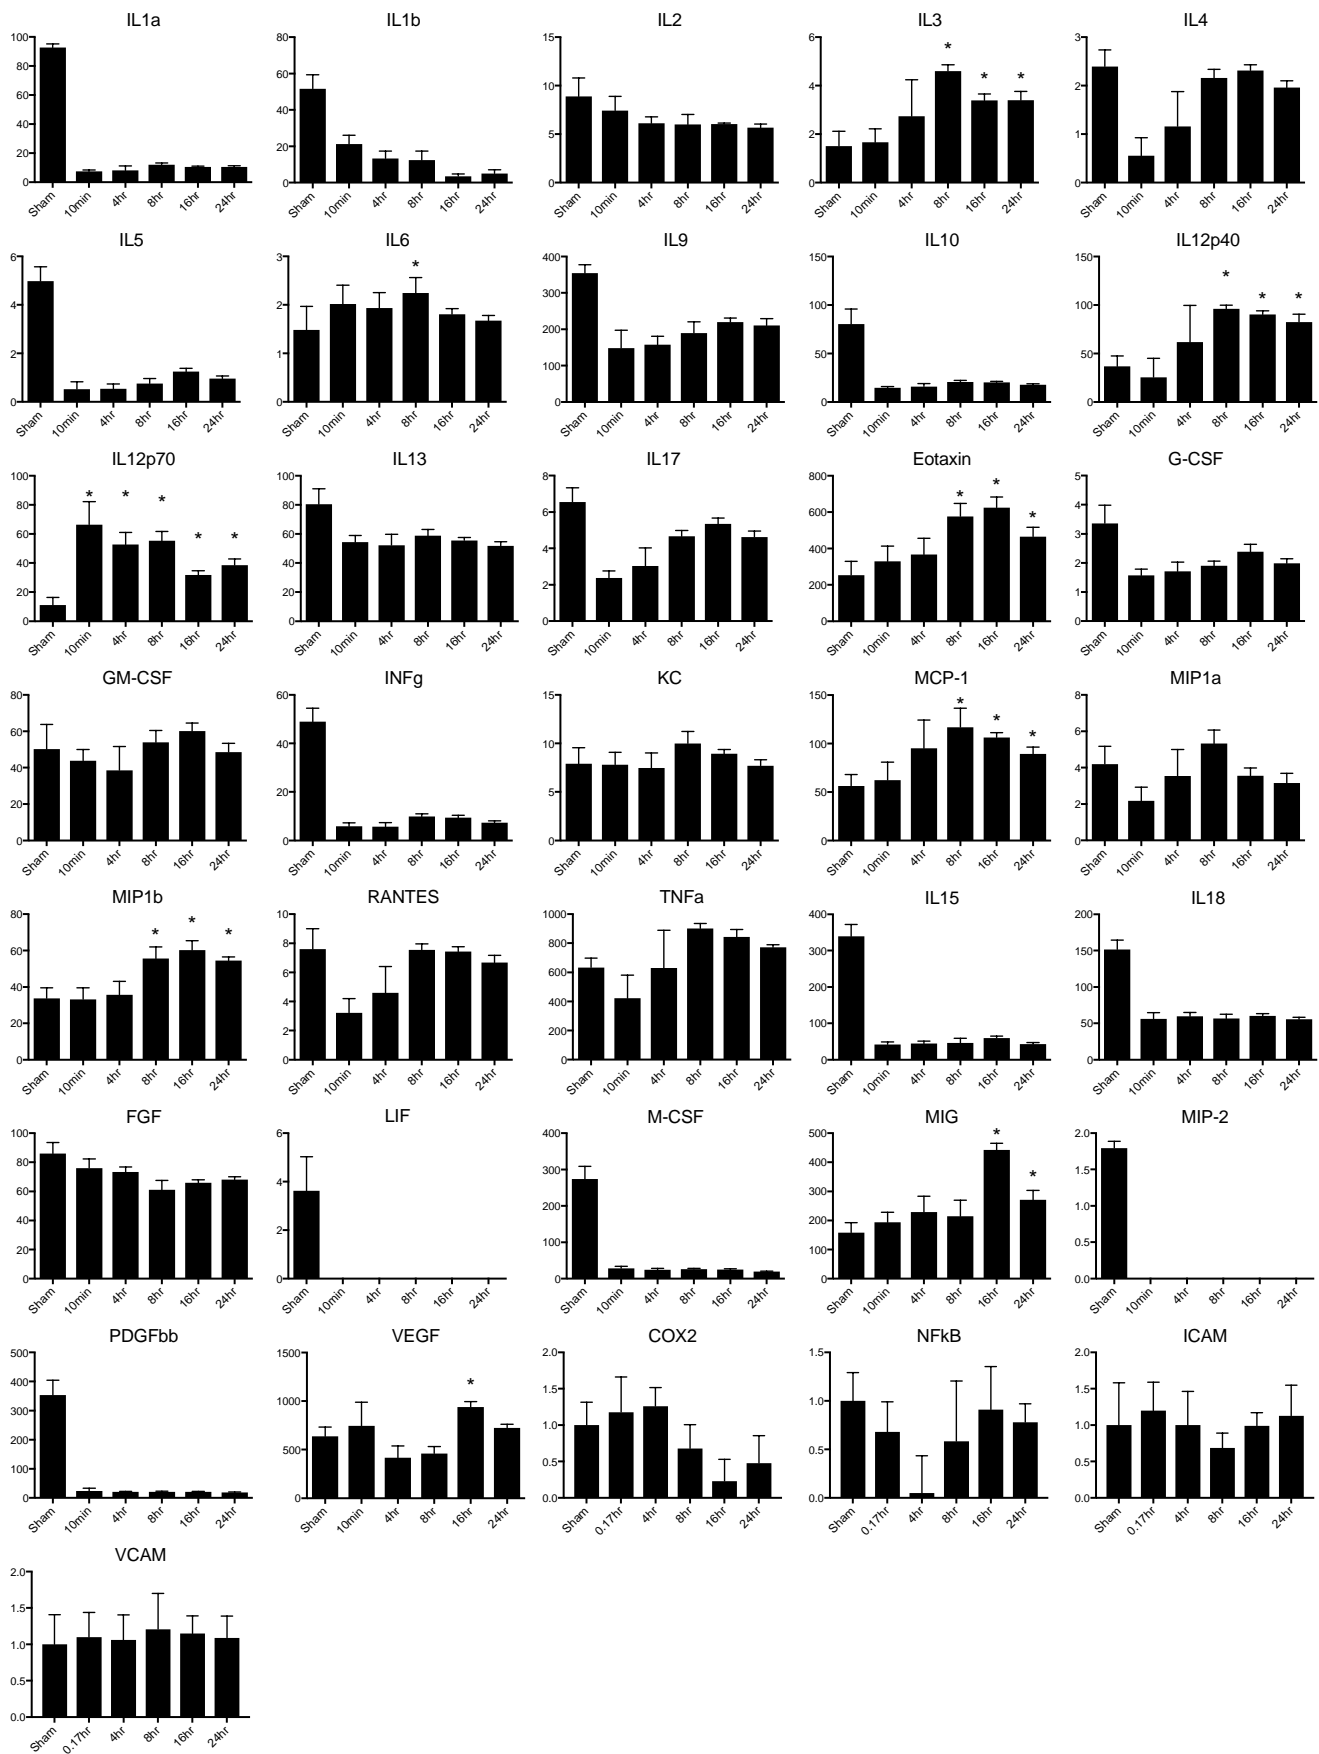

**Supplemental Figure 4.** Temporal changes in cytokines chemokines, trophic factors, and cell adhesion molecules following pFUS to the kidney when mice were pretreated with etanercept (see methods for details). Y axes indicate concentration in pg/mL. Asterisks indicate statistically significant increases ( $p < 0.05$ ) from sham (no drugs, no pFUS) controls by ANOVA using Bonferonni post-hoc analyses.

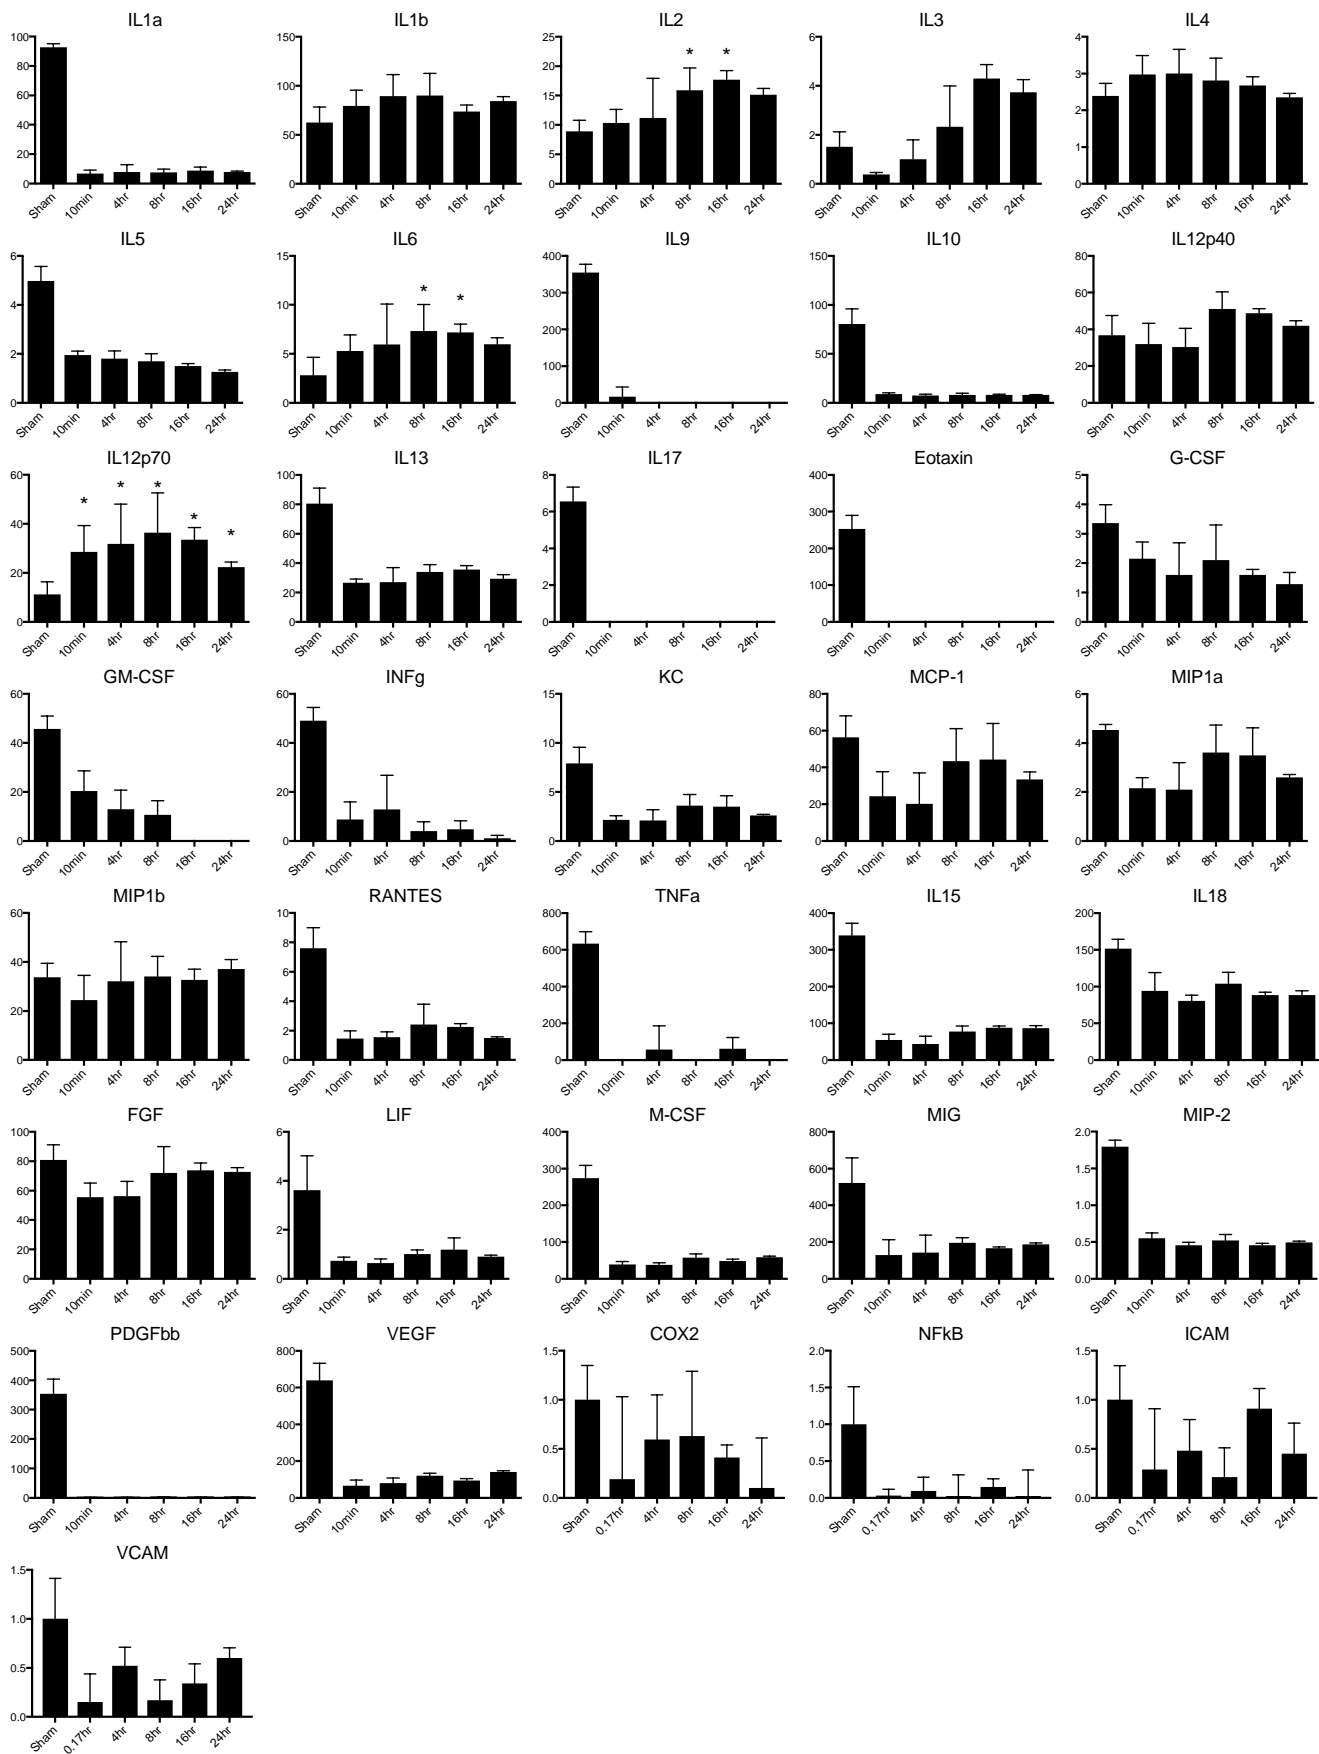

**Supplemental Figure 5.** Temporal changes in cytokines chemokines, trophic factors, and cell adhesion molecules following pFUS to the kidney when mice were pretreated with prednisolone (see methods for details). Y axes indicate concentration in pg/mL. Asterisks indicate statistically significant increases ( $p < 0.05$ ) from sham (no drugs, no pFUS) controls by ANOVA using Bonferonni post-hoc analyses.
